# Supplementary material for: Estimation of Daily Actual Evapotranspiration of Tea Plantations Using Ensemble Machine Learning Algorithms and Six Available Scenarios of Meteorological Data
Source: MDPI journal article supplement (doi:10.3390/app132312961), 2023-12-04
Supplement: s1 [file s1]

## ***Supplementary material***

### **Estimation of daily tea plantation actual evapotranspiration using ensemble machine learning algorithms and six available scenarios of meteorological data.**

Jianwei Geng<sup>1</sup>, Hengpeng Li<sup>1\*</sup>, Wenfei Luan<sup>2</sup>, Yunjie Shi<sup>1,3</sup>, Jiaping Pang<sup>1</sup>, Wangshou Zhang<sup>1</sup>

1 Key Laboratory of Watershed Geographic Sciences, Nanjing Institute of Geography and Limnology, Chinese Academy of Sciences, Nanjing 210008, China

2 School of Surveying and Land Information Engineering, Henan Polytechnic University, Jiaozuo 454003, China

3 University of Chinese Academy of Sciences, Beijing 100049, China

\*Corresponding to Hengpeng Li (hpli@niglas.ac.cn).

GG model

Granger et al. (1989) propose the GG model. He select the evapotranspiration of surface saturated atmospheric parameters and surface temperature constant as potential evapotranspiration. Meanwhile, surface saturated atmospheric parameters and energy constant were selected as moist environment evapotranspiration. Using Dalton's evaporation law, the quantitative complementary relationship between actual evapotranspiration and potential evapotranspiration is derived, and the concept of relative evapotranspiration is further introduced to estimate actual evapotranspiration.

$$E_a = \frac{\Delta G * R_n}{\Delta G + \gamma \lambda} + \frac{\gamma G}{\Delta G + \gamma} * E_s$$

Where  $\Delta$  is the slope of saturated water vapor pressure curve; G is the soil heat flux;  $R_n$  is the net radiation;  $\gamma$  is the constant of the psychrometer (k Pa/ °C));  $E_s$  is the drying force (mm/day).

Supplementary Figures

**Figure S1.** The general schedule of phenology, managements and rainy/dry season for the study tea plantations. The pruning period is also the early growing season of the study tea plantations. The pictures were taken in the middle or late days of each month (Geng et al., 2020).

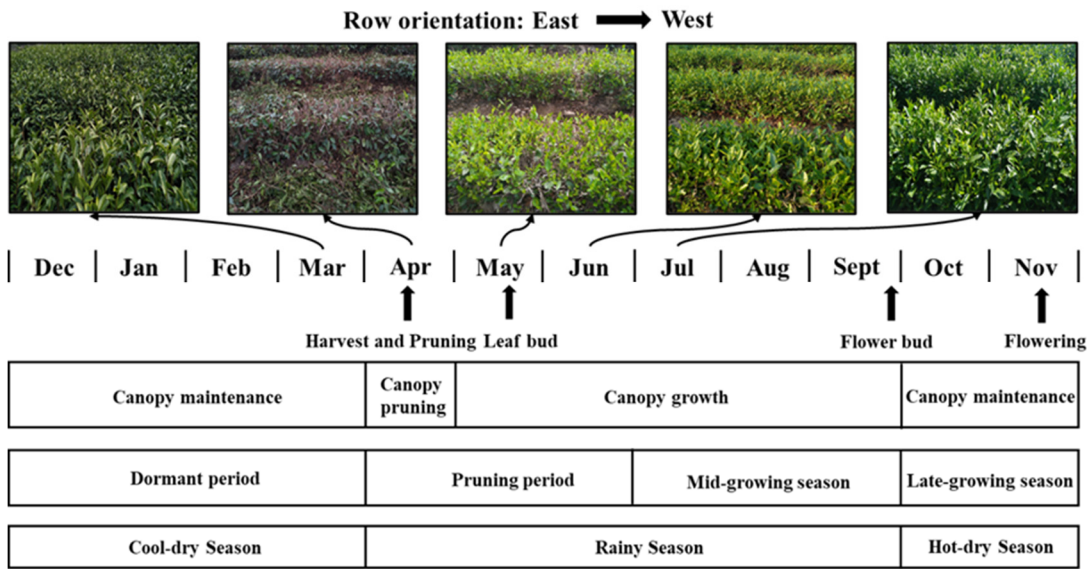

**Figure S2,** a) Normal Support Vector Machine model; b) Soft-margin Support Vector Machine model.

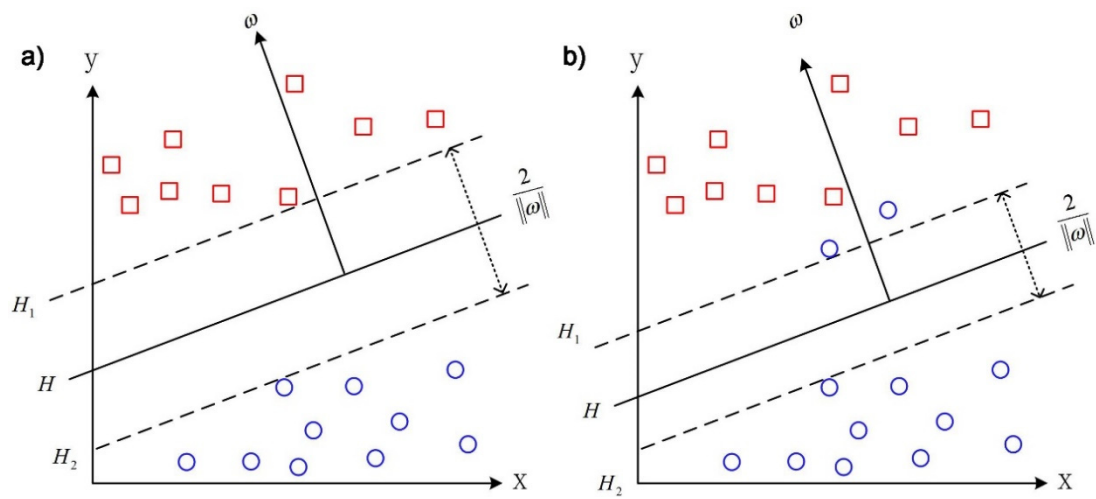

**Figure S3.** Classic multilayer perceptron structure.

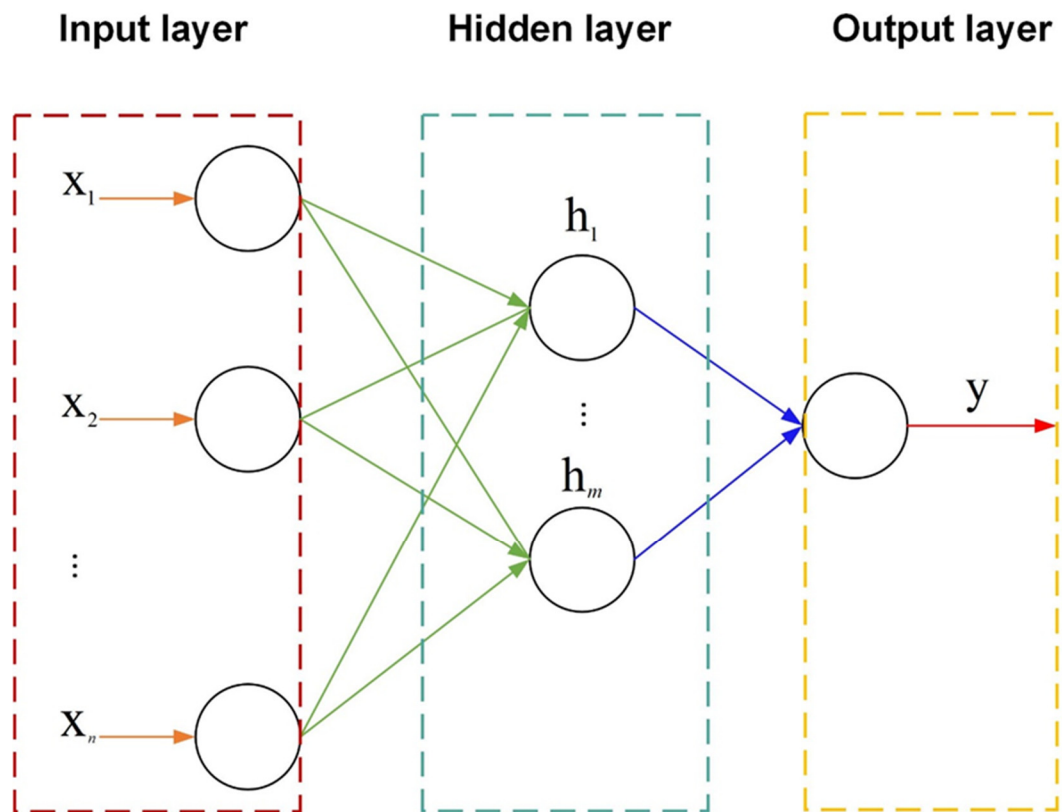

## Supplementary Tables

**Tables S1** Seasonal variations of major biophysical parameters at the tea plantation.

| Month     | Height<br>(cm) | Crown width<br>(cm) | Ridge spacing<br>(cm) | LAI<br>(m <sup>2</sup> m <sup>-2</sup> ) |
|-----------|----------------|---------------------|-----------------------|------------------------------------------|
| January   | 115±6          | 97±9                | 36±9                  | 3.6                                      |
| February  | 115±4          | 97±8                | 35±7                  | 3.7                                      |
| March     | 115±5          | 108±10              | 31±5                  | 4.1                                      |
| April     | 23±3           | 53±6                | 67±5                  | 0.8                                      |
| May       | 45±6           | 65±8                | 53±4                  | 0.9                                      |
| June      | 75±7           | 86±4                | 42±2                  | 2.4                                      |
| July      | 80±8           | 90±5                | 45±6                  | 3.2                                      |
| August    | 103±6          | 95±6                | 41±6                  | 3.5                                      |
| September | 109±5          | 100±6               | 35±8                  | 4.0                                      |
| October   | 116±9          | 101±9               | 37±10                 | 3.7                                      |
| November  | 115±9          | 107±7               | 32±10                 | 4.6                                      |
| December  | 111±10         | 107±12              | 36±12                 | 3.6                                      |

## References

- Geng JW, Li HP, Pang JP, Zhang WS, Chen DQ. Dynamics and environmental controls of energy exchange and evapotranspiration in a hilly tea plantation, China. *Agricultural Water Management* 2020; 241.
- Granger, R. J. , and D. M. Gray . "Evaporation from natural nonsaturated surfaces." *Journal of Hydrology* 111.1-4(1989):21-29.
