# Supplementary material for: Estimation of Daily Actual Evapotranspiration of Tea Plantations Using Ensemble Machine Learning Algorithms and Six Available Scenarios of Meteorological Data
Source: MDPI journal article supplement (doi:10.3390/app132312961), 2023-12-04
Supplement: s1 [file s1]

Archive with 1 entries (1 files):
- applsci-2694531-supplementary.pdf
